## Chorionic Gonadotropin $\beta$ -Gene Variants Are Associated with Recurrent Miscarriage in Two European Populations

Kristiina Rull, Liina Nagirnaja, Veli-Matti Ulander, Piret Kelgo, Tõnu Margus, Milja Kaare, Kristiina Aittomäki, and Maris Laan

Departments of Biotechnology (K.R., L.N., P.K., M.L.) and Bioinformatics (T.M.), Institute of Molecular and Cell Biology, University of Tartu, Riia 23, 51010 Tartu, Estonia; Department of Obstetrics and Gynecology (K.R.), University of Tartu, Lossi 36, 51003 Tartu, Estonia; Departments of Obstetrics and Gynecology (V.-M.U.) and Clinical Genetics (K.A.), Helsinki University Central Hospital, Helsinki FI-00029 HUS, Finland; and Folkhälsan Institute of Genetics (M.K., K.A.), University of Helsinki, FI-00014 Helsinki, Finland

**Context:** The incidence of recurrent miscarriage (RM) ( $\geq 3$  consecutive pregnancy losses) is estimated as 1–2% in fertile couples. Familial clustering of RM has suggested the contribution of a genetic component.

**Objective:** A low level of human chorionic gonadotropin (HCG) in maternal serum during the first trimester of the pregnancy is a clinically accepted risk factor for miscarriage. We sought to study whether variation in *chorionic gonadotropin*  $\beta$ -subunit genes (*CGBs*) expressed in placenta may contribute to the risk of RM.

**Design:** Resequencing of *CGB5* and *CGB8*, the two most actively transcribed loci of the four *HCG*  $\beta$ -duplicate genes, was performed.

**Setting:** A case-control study involving two sample sets, from Estonia ( $n = 194$ ) and Finland ( $n = 185$ ), was performed.

**Patients:** RM patients ( $n = 184$ ) and fertile controls ( $n = 195$ ) participated in the study.

**Results:** From 71 identified variants in *CGB5* and *CGB8*, 48 polymorphisms were novel. Significant protective effect was associated with two single nucleotide polymorphisms located at identical positions in intron 2 in both *CGB5* [ $P = 0.007$ ; odds ratio (OR) = 0.53] and *CGB8* ( $P = 0.042$ ; OR = 0.15), and with four *CGB5* promoter variants ( $P < 0.03$ ; OR = 0.54–0.58). The carriers of minor alleles had a reduced risk of RM. The haplotype structure of the *CGB8* promoter was consistent with balancing selection; a rare mutation in *CGB8* initiator element was detected only among patients ( $n = 3$ ). In addition, three rare nonsynonymous substitutions were identified among RM cases as possible variants increasing the risk of recurrent pregnancy loss.

**Conclusion:** The findings encourage studying the functional effect of the identified variants on *CGB* expression and HCG hormone activity to elucidate further the role of *CGB* variation in RM. (*J Clin Endocrinol Metab* 93: 4697–4706, 2008)

**R**ecurrent miscarriage (RM) or habitual abortion is defined as three or more consecutive pregnancy losses before 22 gestational weeks or the spontaneous abortion of an embryo/fetus weighing less than 500 g. The occurrence of RM is estimated as

1–2% of fertile couples (1, 2). Although the patients with RM undergo multiple diagnostical tests to detect parental chromosomal anomalies, maternal thrombophilic, endocrine, or immunological disorders, over 50% of the RM cases are classified as

0021-972X/08/\$15.00/0

Printed in U.S.A.

Copyright © 2008 by The Endocrine Society

doi: 10.1210/jc.2008-1101 Received May 20, 2008. Accepted September 2, 2008.

First Published Online September 9, 2008

Abbreviations: AP, Activating protein; *CGB*, *chorionic gonadotropin*  $\beta$ -subunit gene; CI, confidence interval; HCG, human chorionic gonadotropin; HW, Hardy-Weinberg Equilibrium; LD, linkage disequilibrium; MAF, minor allele frequency; OR, odds ratio; RM, recurrent miscarriage; SNP, single nucleotide polymorphism.

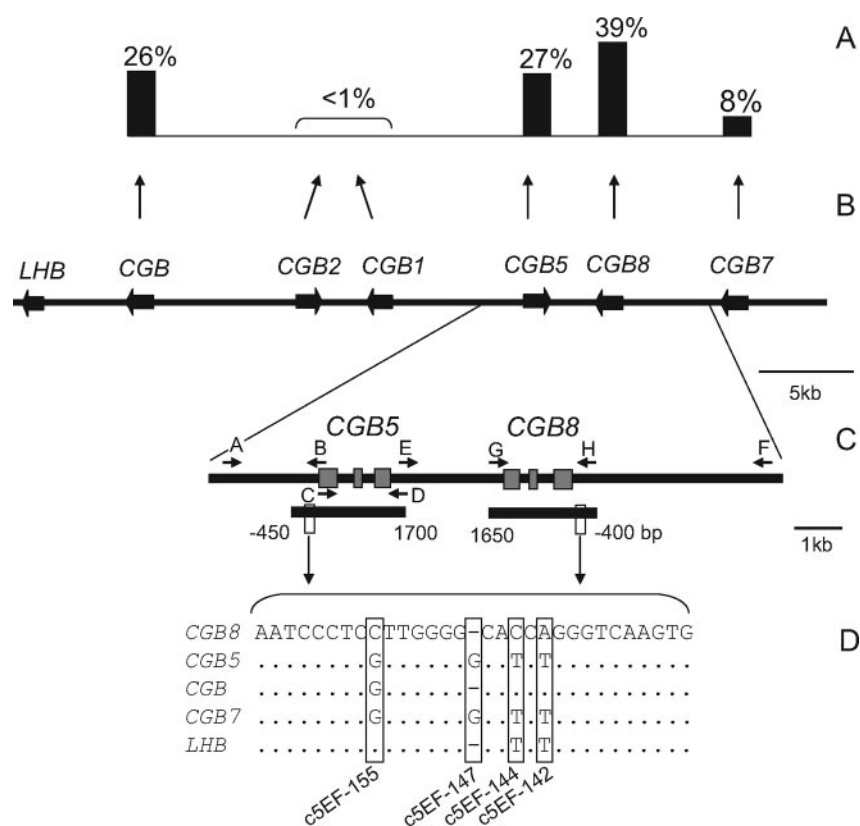

**FIG. 1.** Genomic and expressional context for the design of the association study targeting HCG  $\beta$ -genes. **A**, The contribution of each individual gene into the total mRNA transcript pool of all six CGB genes (18). **B**, Schematic presentation of the LHB/CGB gene cluster with genes marked as black wide arrows in the direction of transcription on sense strand. **C**, The position of long-range PCR primers (black arrows) and extent of resequenced CGB5 and CGB8 regions (short black bars). Gene exons are depicted with gray boxes. Capital letters correspond to the primer sequences listed in supplemental Table S1. **D**, The aligned consensus sequences of the 5'-upstream element of LHB/CGB genes. The nucleotide positions distinctive for each HCG  $\beta$ - and LHB gene colocalizing with CGB5 SNPs c5EF-155, c5EF-147, c5EF-144, and c5EF-142 (Table 1) are highlighted. All positions are given relative to mRNA transcription start site.

idiopathic (3). An increased prevalence of miscarriage among first-degree relatives of the women suffering from RM (4) suggests genetic contribution in recurrent pregnancy loss. Possible candidates include genes regulating the development of maternal immunotolerance and inflammatory response, coagulation, angiogenesis, vascular tone, and apoptosis. Prime candidates of the molecular causes of RM have been various thrombophilic gene mutations (5–7). Convincing data have also been reported on the association between the miscarriage rates and the polymorphisms in *HLA-G* gene expressed on the surface of the invading cytotrophoblasts (8).

So far, major interest has focused on the physiological response of the mother to the pregnancy. Less attention has been paid to the placental proteins coded by the fetal genome with contribution from both maternal and paternal genes and their variants. One of the first proteins produced by the conceptus is human chorionic gonadotropin (HCG), also known as “the pregnancy hormone” due to its essential role in human reproduction. The main function of HCG is to delay the apoptosis of the corpus luteum during the first trimester of pregnancy. HCG has several paracrine effects in the process of implantation (9), angiogenesis, and placentation (10, 11), and development of maternal immunotolerance (12). Low level and nonexponential in-

crease of HCG in maternal serum during the first trimester of the pregnancy are clinically accepted risk factors for miscarriage (13–15).

The hormone-specific HCG  $\beta$ -subunit is expressed by syncytiotrophoblasts of placenta and is encoded by four *chorionic gonadotropin  $\beta$*  (CGB) genes (CGB, CGB5, CGB, and CGB8) located within the LHB/CGB gene cluster at 19q13.3 (Fig. 1B). Among the four HCG  $\beta$ -duplicate genes, CGB8 and CGB5 are the most actively transcribed and contribute together 62–82% to the total pool of  $\beta$ -subunit mRNA transcripts [Fig. 1A (16–18)]. Our previous data on the HCG  $\beta$ -genes showed that: 1) their diversity level is one of the highest reported for human genes, 2) there is high interindividual and intergenic difference in expression, and 3) mRNA transcription level is significantly lower in cases of RM compared with normal first-trimester pregnancies (18–20). Now we have addressed the question whether particular variants in these genes may contribute to pregnancy failure. High-genetic variation in the LHB/CGB region and the aim to capture both rare and common variation prompted us to choose resequencing instead of traditional genotyping. We analyzed CGB5 and CGB8 in Estonian and Finnish RM cases ( $n = 184$ ) and fertile women ( $n = 195$ ) by comparing variation and haplotype patterns between the two groups. Consistent with the hypothesis

of the study, we identified genetic variants in HCG  $\beta$ -genes either significantly increasing or reducing a subject's risk to experience recurrent pregnancy loss.

## Subjects and Methods

### Study subjects

The study was approved by the Ethics Committees of the University of Tartu, Estonia (protocol nos. 117/9, 16.06.03 and 126/14, 26.04.2004) and the Department of Obstetrics and Gynecology, Helsinki University Central Hospital Outpatient Clinic for women with RM (protocol no. 298/E2/2000). Subjects were recruited, and blood samples for the DNA extraction were collected at the Women's Clinic of Tartu University Hospital and Nova Vita Clinic, Centre for Infertility Treatment and Medical Genetics, Tallinn, Estonia in 2003–2007, and in the Department of Gynaecology and Obstetrics of the Helsinki University Hospital in Finland during 2001–2004. Written informed consent was obtained from every study participant. In both participating centers, patients with at least three or more abortions during the first trimester of pregnancy were recruited ( $n = 184$ ; age 18–40 yr). Because maternally and paternally derived gene variants contribute equally to the function of a fetal genome, the patient group included both the women and their partners who had experienced recurrent pregnancy losses. In the Estonian sample collection, the patient group consisted of 32 couples and 29 females with RM, and an additional three couples with three or more

unsuccessful *in vitro* fertilization procedures. In the Finnish sample collection, the RM group consisted of 40 couples and five females with RM (detailed description in Refs. 21 and 22). The control group ( $n = 195$ ) consisted of age-matched fertile women with no history of miscarriage and either at least one normal pregnancy (the Finnish subjects,  $n = 100$ ) or more stringently, three or more successful deliveries (the Estonian subjects,  $n = 95$ ). The control group was designed under the assumption that fertile women with no history of spontaneous abortions are carrying gene variants supporting successful pregnancies. Their male partners were not recruited into the control group because detailed reliable information on their past reproductive history was unavailable.

All patients had a normal karyotype tested from peripheral blood lymphocyte cultures. Female patients having uterine anomalies were excluded by ultrasonography or hystero-sonogram.

### Amplification and resequencing of *CGB5* and *CGB8*

DNA was extracted from peripheral blood using a protocol based on the salting-out method for DNA extraction. The *CGB5* (~1.7 kb fragment) and *CGB8* (long-range PCR ~8.3 kb; nested PCR ~2.5 kb fragment) genomic regions (Fig. 1C) were amplified and resequenced using previously described primers and conditions (19). The resequenced region involving *CGB8* covered 2050 bp, including the entire *CGB8* (1474 bp) and 400-bp 5'-upstream region. The resequenced region for *CGB5* (1468 bp) covered the full genic region and part of 3'-downstream region (Fig. 1C). Additional primers were designed for the analysis of the 5'-upstream region of the *CGB5* gene (450 bp) using the Primer3 software ([http://frodo.wi.mit.edu/cgi-bin/primer3/primer3\\_www.cgi](http://frodo.wi.mit.edu/cgi-bin/primer3/primer3_www.cgi)). Specificity of the PCR products was verified in three steps: 1) design of unique primer pairs for specific amplification of only one of the seven duplicated genes; 2) verification of monomorphic status of gene-specific positions used as markers for each individual gene (supplemental Fig. S1, which is published as supplemental data on The Endocrine Society's Journals Online web site at <http://jcem.endojournals.org>); and 3) test for Hardy-Weinberg Equilibrium (HWE) for each identified single nucleotide polymorphism (SNP). Primer sequences for PCR and resequencing are listed in supplemental Table S1, which is published as supplemental data on The Endocrine Society's Journals Online web site at <http://jcem.endojournals.org>. The sequences were resolved using either ABI 3730 X1 or ABI 3730 XL DNA Analyzer (Applied Biosystems, Foster City, CA) and assembled into a contig as described (19). Polymorphisms were identified using the PolyPhred program (Version 6.02) (<http://www.phrap.org/phredphrapconsed.html>) (23) and confirmed by manual checking. A genetic variant was verified only if it was observed in both forward and reverse orientations. In case of indel heterozygosity, the genotype of the subject was confirmed using two independent forward and two reverse primers. The nomenclature of the identified polymorphisms was based on the GenBank reference sequences: NM\_033043.1 GI:15451747 for *CGB5*, and NM\_033183.2 GI:146229337 for *CGB8*.

### Data analysis

Allele frequencies were estimated, and conformance to HWE was calculated ( $\alpha = 0.05$ ). In total, eight rare SNPs in the 5'-upstream region of *CGB5* were found to be deviating from HWE, as one individual was homozygous for minor allele of all these SNPs.

Haplotypes were inferred from unphased genotype data using the Bayesian statistical method in the program PHASE 2.1.1 [<http://www.stat.washington.edu/stephens/> (24)], applying the model allowing recombination. The running parameters were: number of iterations = 1000, thinning interval = 1, burn-in = 100; the  $-X10$  parameter was used for increasing the number of iterations of the final run of the algorithm.

Sequence diversity parameters and neutrality tests were calculated using DnaSP [version 4.0; <http://www.ub.es/dnasp/> (25)], with the most probable phased haplotypes as an input sequence. The direct estimate of per-site heterozygosity ( $\pi$ ) was derived from the average pairwise sequence differences, whereas Watterson's  $\theta$  represents an estimate of the expected per-site heterozygosity based on the number of segregating sites

(S). The basis of the Tajima's D statistic (26) is the difference between the  $\pi$  and  $\theta$  estimates: under neutral conditions  $\pi = \theta$  and  $D^T = 0$ . The Ewens-Watterson homozygosity test implemented in Arlequin 2.000 software [<http://cmpg.unibe.ch/software/arlequin3/> (27)] was used to test the hypothesis that haplotypes are selectively neutral. An excess of rare variants (= homozygosity excess) indicates directional selection, whereas an excess of intermediate frequency variants (= homozygosity deficiency) indicates balancing selection. The relationship between inferred haplotypes was analyzed with NETWORK 4.201 software (<http://www.fluxus-technology.com/>) using the Median-Joining network algorithm (28). Haplotype networks of *CGB5* and *CGB8* were calculated using: 1) SNPs located in the genic region from the transcription initiation site until the end of the mRNA, and 2) promoter SNPs located 5'-upstream of the genic region. Singleton polymorphisms were excluded from network calculations (cannot be reliably phased) performed with default parameters. The descriptive statistics of linkage disequilibrium (LD),  $r^2$  was calculated for pairs of markers and summarized by Haploview software (29).

The significance of the association between the identified SNPs in *CGB5* and *CGB8* genes and the occurrence of RM was tested using the Cochran-Armitage test for trend implemented in the statistical analysis package JMP 6.0.3 with Genomics module 2.0.6 (<http://www.jmp.com/software/genomics/>). The same test was applied to address the interpopulation (Estonians, Finns) differentiation. Odds ratio (OR) with 95% confidence intervals (CIs) were calculated to show the strength and direction of the association. In all tests,  $P < 0.05$  was considered statistically significant.

## Results

### Resequencing of *CGB5* and *CGB8*

We sequenced the entire genic and 5'-upstream regions of *CGB5* and *CGB8* genes in a sample collection consisting of Finnish and Estonian patients with RM ( $n = 184$ ;  $n = 85$  Finns,  $n = 99$  Estonians) and fertile controls ( $n = 195$ ;  $n = 100$  Finns,  $n = 95$  Estonians). For every subject the entire sequenced region covered 4.3 kbp (Fig. 1, B and C). In total, 71 variants were identified: 29 and 19 SNPs in the genic part of *CGB5* and *CGB8*, respectively; 18 and three SNPs in the 5'-upstream regions of *CGB5* and *CGB8*, respectively; and two SNPs 3'-downstream of *CGB5* (Table 1). Among the 71 detected SNPs, 48 (68%) were novel variants, previously not described in dbSNP database (<http://www.ncbi.nlm.nih.gov/SNP/>) and literature. Neither *CGB5* nor *CGB8* has been covered by the most recent version of HapMap (<http://www.hapmap.org/>; release March 2008). The diversity parameter  $\pi$  that describes the mean nucleotide diversity per base pair differed in the genic and 5'-upstream regions (Table 2). Among fertile women the diversity of *CGB5* ( $\pi = 2.71 \times 10^{-3}$ ) and *CGB8* ( $\pi = 2.01 \times 10^{-3}$ ) 5'-upstream regions was approximately 2-fold higher compared with the genic regions of *CGB5* ( $\pi = 1.69 \times 10^{-3}$ ) and *CGB8* ( $\pi = 9.5 \times 10^{-4}$ ).

Two thirds of the identified variants ( $n = 41$ ; 58%) were shared by Estonian and Finnish sample collections. In both sample collections, there were 15 population-specific SNPs represented as single or low-frequency variants (<2%). A majority of the shared SNPs showed no differences ( $P > 0.05$ ) among the two study populations. A significant difference in allele frequencies was detected for eight of 71 SNPs, most being rare variants (Table 1). LD between the identified SNPs in the resequenced region was nearly absent in both population samples (Fig. 2).

**TABLE 1.** Characteristics of SNPs identified in *CGB5* and *CGB8* in Estonian and Finnish sample sets

| SNP<br>code <sup>a</sup>               | Position relative<br>to ATG | Location        | Allele <sup>b</sup> major/minor<br>amino acid change <sup>c</sup> | MAF in a subsample<br>(%) |                      | Population<br>difference<br>(P value) <sup>d</sup> | rs no. <sup>e</sup>                    |                                        |
|----------------------------------------|-----------------------------|-----------------|-------------------------------------------------------------------|---------------------------|----------------------|----------------------------------------------------|----------------------------------------|----------------------------------------|
|                                        |                             |                 |                                                                   | Estonian<br>(n = 194)     | Finnish<br>(n = 185) |                                                    |                                        |                                        |
| Variants in <i>CGB5</i> genomic region |                             |                 |                                                                   |                           |                      |                                                    |                                        |                                        |
| c5F-447                                | −812                        | 5′-upstream     | T/G                                                               | 0                         | S (Co)               | 0.304                                              | rs4801789                              |                                        |
| c5F-399                                | −764                        |                 | T/C                                                               | 0                         | 0.82                 | 0.167                                              |                                        |                                        |
| c5EF-322                               | −687                        |                 | T/C                                                               | 0.52                      | 0.82                 | 0.667                                              |                                        |                                        |
| c5EF-315                               | −680                        |                 | T/G                                                               | S (Pa)                    | 1.9                  | 0.071                                              |                                        |                                        |
| c5EF-314                               | −679                        |                 | C/A                                                               | S (Pa)                    | 1.09                 | 0.234                                              |                                        |                                        |
| c5EF-309                               | −674                        |                 | C/T                                                               | S (Pa)                    | 1.09                 | 0.234                                              |                                        |                                        |
| c5EF-306                               | −671                        |                 | T/G/C                                                             | S (Pa)                    | 2.45                 | 0.037                                              |                                        |                                        |
| c5EF-291                               | −656                        |                 | C/T                                                               | 21.65                     | 17.66                | 0.162                                              |                                        |                                        |
| c5F-204                                | −569                        |                 | A/G                                                               | 0                         | 1.36                 | 0.051                                              |                                        |                                        |
| c5F-191                                | −557                        |                 | T/C                                                               | 0                         | 1.36                 | 0.051                                              |                                        |                                        |
| c5EF-155                               | −520                        |                 | G/C                                                               | 10.57                     | 9.24                 | 0.543                                              |                                        |                                        |
| c5EF-147                               | −512                        |                 | G/del                                                             | 10.57                     | 8.7                  | 0.373                                              |                                        |                                        |
| c5EF-144                               | −509                        |                 | T/C                                                               | 10.57                     | 10.6                 | 0.989                                              |                                        |                                        |
| c5EF-142                               | −507                        |                 | T/A                                                               | 10.57                     | 10.6                 | 0.989                                              |                                        |                                        |
| c5EF-82                                | −447                        |                 | G/A                                                               | 1.8                       | 1.63                 | 0.853                                              |                                        |                                        |
| c5EF-30                                | −395                        | G/C             | 0.77                                                              | 1.36                      | 0.429                |                                                    |                                        |                                        |
| c5E-28                                 | −393                        | C/T             | 1.55                                                              | 0                         | 0.016                |                                                    |                                        |                                        |
| c5EF-1                                 | −366                        | A/G             | S (Co)                                                            | S (Co)                    | 0.973                |                                                    |                                        |                                        |
| c5E101                                 | −265                        | 5′-UTR          | C/T                                                               | 0.52                      | 0                    | 0.166                                              | rs710899                               |                                        |
| c5EF138                                | −228                        |                 | A/G                                                               | 12.11                     | 6.76                 | 0.011                                              |                                        |                                        |
| c5E157                                 | −209                        |                 | C/T                                                               | 0.52 (Pa)                 | 0                    | 0.166                                              |                                        |                                        |
| c5F206                                 | −160                        |                 | C/T                                                               | 0                         | S (Co)               | 0.305                                              |                                        |                                        |
| c5F324                                 | −42                         |                 | G/A                                                               | 0                         | 0.54 (Co)            | 0.146                                              |                                        |                                        |
| c5EF345                                | −21                         | Intron1         | G/C                                                               | 22.16                     | 16.76                | 0.055                                              | rs12610392                             |                                        |
| c5F354                                 | −12                         |                 | G/del                                                             | 0                         | 1.08                 | 0.040                                              |                                        |                                        |
| c5E519                                 | 154                         |                 | G/T                                                               | 0.52                      | 0                    | 0.166                                              |                                        |                                        |
| c5E525                                 | 160                         |                 | A/G                                                               | 0.52                      | 0                    | 0.166                                              | rs35621293                             |                                        |
| c5E527                                 | 162                         |                 | G/A                                                               | 0.52                      | 0                    | 0.166                                              |                                        |                                        |
| c5E529                                 | 164                         |                 | G/A                                                               | S (Pa)                    | 0                    | 0.328                                              |                                        |                                        |
| c5EF544                                | 179                         |                 | T/G                                                               | 33.25                     | 25.68                | 0.024                                              | rs3956245<br>rs4002422                 |                                        |
| c5E551                                 | 186                         |                 | C/T                                                               | 0.77                      | 0                    | 0.089                                              |                                        |                                        |
| c5F553                                 | 188                         |                 | T/C                                                               | 0                         | 0.54 (Co)            | 0.146                                              | rs34524624                             |                                        |
| c5EF580                                | 215                         |                 | G/A                                                               | 21.65                     | 17.03                | 0.104                                              |                                        |                                        |
| c5F660                                 | 295                         |                 | A/C                                                               | 0                         | S (Pa)               | 0.305                                              |                                        |                                        |
| c5EF666                                | 301                         |                 | C/T                                                               | 32.73                     | 25.41                | 0.027                                              | rs35871536<br>rs35133942               |                                        |
| c5EF789                                | 424                         |                 | G/A p.Pro24Pro                                                    | 21.13                     | 17.03                | 0.148                                              |                                        |                                        |
| c5E912                                 | 547                         |                 | Intron2                                                           | G/C                       | 0.77                 | 0                                                  | 0.089                                  | rs33933429<br>rs34335161<br>rs33976607 |
| c5E918                                 | 553                         |                 |                                                                   | C/G                       | 0.52                 | 0                                                  | 0.166                                  |                                        |
| c5EF1038                               | 673                         | C/T             | 11.86                                                             | 10.81                     | 0.651                |                                                    |                                        |                                        |
| c5EF1069                               | 704                         | A/G             | 1.55                                                              | 2.43                      | 0.376                | rs34935416                                         |                                        |                                        |
| c5F1111                                | 746                         | A/T             | 0                                                                 | 0.54 (Co)                 | 0.146                |                                                    |                                        |                                        |
| c5EF1115                               | 750                         | C/T             | 3.35                                                              | 0.54                      | 0.005                |                                                    |                                        |                                        |
| c5F1178                                | 813                         | Exon3           | G/C p.Val76Leu                                                    | 0                         | S (Pa)               | 0.305                                              | rs35756580                             |                                        |
| c5EF1258                               | 893                         |                 | C/T p.Tyr102Tyr                                                   | 4.64                      | 0.81 (Co)            | 0.001                                              |                                        |                                        |
| c5E1390                                | 1025                        |                 | C/A p.Pro146Pro                                                   | S (Co)                    | 0                    | 0.328                                              |                                        |                                        |
| c5EF1402                               | 1037                        | T/C p.Ser150Ser | S (Co)                                                            | S (Pa)                    | 0.973                | rs35756580                                         |                                        |                                        |
| c5EF1426                               | 1061                        | G/A p.Ser158Ser | S (Co)                                                            | S (Pa)                    | 0.973                |                                                    |                                        |                                        |
| c5E1501                                | 1136                        | 3′-downstream   | T/C                                                               | S (Pa)                    | 0                    |                                                    | 0.328                                  |                                        |
| c5EF1660                               | 1295                        |                 | A/T                                                               | 1.29                      | 1.08                 | 0.502                                              |                                        |                                        |
| Variants in <i>CGB8</i> genomic region |                             |                 |                                                                   |                           |                      |                                                    |                                        |                                        |
| c8EF-287                               | −659                        | 5′-upstream     | T/C                                                               | 26.49                     | 23.85                | 0.417                                              | rs4801790<br>rs8102901                 |                                        |
| c8EF-186                               | −558                        |                 | G/T                                                               | 40.21                     | 39.08                | 0.754                                              |                                        |                                        |
| c8EF-4                                 | −376                        |                 | T/A                                                               | 0.52 (Pa)                 | S (Pa)               | 0.627                                              |                                        |                                        |
| c8EF105                                | −268                        | 5′-UTR          | G/C                                                               | 4.12                      | 0.57 (Co)            | 0.003                                              | rs34212754<br>rs13345685<br>rs35930240 |                                        |
| c8EF108                                | −265                        |                 | C/T                                                               | 39.95                     | 39.08                | 0.808                                              |                                        |                                        |
| c8EF301                                | −72                         |                 | T/A                                                               | 5.41                      | 6.32                 | 0.597                                              |                                        |                                        |
| c8EF432                                | 60                          | Intron1         | A/C                                                               | 0.52                      | 0.57 (Co)            | 0.913                                              |                                        |                                        |
| c8F461                                 | 89                          |                 | T/C                                                               | 0                         | S (Pa)               | 0.290                                              |                                        |                                        |

(Continued)

(Continued)

TABLE 1. (Continued)

| SNP code <sup>a</sup> | Position relative to ATG | Location | Allele <sup>b</sup> major/minor amino acid change <sup>c</sup> | MAF in a subsample (%) |                   | Population difference (P value) <sup>d</sup> | rs no. <sup>e</sup> |
|-----------------------|--------------------------|----------|----------------------------------------------------------------|------------------------|-------------------|----------------------------------------------|---------------------|
|                       |                          |          |                                                                | Estonian (n = 194)     | Finnish (n = 185) |                                              |                     |
| c8EF523               | 151                      |          | G/T                                                            | S (Co)                 | 0.86 (Pa)         | 0.264                                        |                     |
| c8F526                | 154                      |          | T/G                                                            | 0                      | S (Co)            | 0.290                                        | <b>rs2387591</b>    |
| c8EF541               | 169                      |          | G/C                                                            | 39.69                  | 39.37             | 0.928                                        | <b>rs13345575</b>   |
| c8F551                | 179                      |          | G/T                                                            | 0                      | S (Co)            | 0.290                                        |                     |
| c8F558                | 186                      |          | T/C                                                            | 0                      | S (Co)            | 0.290                                        |                     |
| c8EF673               | 301                      |          | T/C                                                            | S (Co)                 | S (Co)            | 0.938                                        |                     |
| <u>c8E806</u>         | 434                      | Exon2    | C/T p.Arg28Trp                                                 | S (Pa)                 | 0                 | 0.343                                        |                     |
| c8EF869               | 497                      |          | G/A p.Val49Ile                                                 | 2.32                   | S (Pa)            | 0.017                                        |                     |
| c8EF925               | 553                      | Intron2  | G/C                                                            | 2.06                   | 3.16              | 0.341                                        | rs2303050           |
| c8EF1045              | 673                      |          | C/T                                                            | 0.52                   | 1.72 (Co)         | 0.112                                        | <b>rs33943298</b>   |
| c8EF1076              | 704                      |          | G/A                                                            | 1.8                    | 2.01              | 0.836                                        |                     |
| c8EF1122              | 750                      |          | T/C                                                            | 1.8                    | 2.01              | 0.836                                        |                     |
| <u>c8E1237</u>        | 865                      | Exon3    | C/G p.Pro93Arg                                                 | S (Pa)                 | 0                 | 0.343                                        |                     |
| c8E1418               | 1046                     |          | A/T p.Arg153Arg                                                | S (Pa)                 | 0                 | 0.343                                        |                     |

All variants identified in the current study have been submitted to dbSNP database (<http://www.ncbi.nlm.nih.gov/SNP/>), accession nos. ss105106983–ss105107053. Co, Only among fertile women with no miscarriages; Pa, only among RM patients; S, singleton SNP; UTR, untranslated region.

<sup>a</sup> A SNP code includes gene and sample name (e.g. c5 = CGB5; E = Estonians, F = Finns), location relative to mRNA start site; GenBank references: NM\_033043.1 GI:15451747 for CGB5, NM\_033183.2 GI:146229337 for CGB8; nonsynonymous changes detected only in patients are *underlined*.

<sup>b</sup> Alleles at the coding strand.

<sup>c</sup> Coding from ATG, including signal protein.

<sup>d</sup> The Cochran-Armitage test for trend.

<sup>e</sup> Variants originally described by Hallast *et al.* (19) are highlighted in *bold*.

Four SNPs represented nonsynonymous amino acid changes: CGB5 p.Val76Leu in a single Finnish RM patient; CGB8 p.Arg28Trp and CGB8 p.Pro93Arg in single Estonian patients; and CGB8 p.Val49Ile in one Finnish and two Estonian patients, and also seven Estonian fertile women (Table 1). Further experimental studies have to be conducted before drawing any conclusions about their effect on the hormone function.

#### CGB5 and CGB8 variants lowering the risk for recurrent pregnancy loss

A case-control study targeting the association of identified CGB5 and CGB8 genetic variants with RM was performed separately for the Estonian (RM cases n = 99; fertile women defined as controls n = 95) and the Finnish subjects (cases n = 85; controls n = 100), as well as for the joint data set. The comparison

TABLE 2. Diversity parameters and neutrality tests of the CGB5 and CGB8 genes in fertile women and patients with RMs

|                                                     | CGB5                     |                                 |                           | CGB8                     |                                 |                           |
|-----------------------------------------------------|--------------------------|---------------------------------|---------------------------|--------------------------|---------------------------------|---------------------------|
|                                                     | Full region <sup>a</sup> | 5'-upstream region <sup>b</sup> | Genic region <sup>c</sup> | Full region <sup>a</sup> | 5'-upstream region <sup>b</sup> | Genic region <sup>c</sup> |
| No. of SNPs                                         | 46                       | 17                              | 29                        | 23                       | 3                               | 20                        |
| Fertile women                                       |                          |                                 |                           |                          |                                 |                           |
| Diversity ( $\pi$ ) <sup>d</sup>                    | 0.00193                  | 0.00271                         | 0.00169                   | 0.00119                  | 0.00201                         | 0.00095                   |
| Tajima D <sup>e</sup>                               | −1.12980                 | −1.16944                        | −0.88132                  | −0.35277                 | <b>2.29389<sup>f</sup></b>      | −0.96141                  |
| P value of Ewens-Watterson F statistic <sup>g</sup> | ns                       | ns                              | ns                        | ns                       | <b>0.007</b>                    | ns                        |
| RM patients                                         |                          |                                 |                           |                          |                                 |                           |
| Diversity ( $\pi$ ) <sup>d</sup>                    | 0.00172                  | 0.00195                         | 0.0016                    | 0.00115                  | 0.00199                         | 0.0009                    |
| Tajima D <sup>e</sup>                               | −1.23744                 | −1.23550                        | −0.91052                  | −0.56306                 | 1.26879                         | −1.06361                  |
| P value of Ewens-Watterson F statistic <sup>g</sup> | ns                       | ns                              | ns                        | ns                       | ns                              | ns                        |

Statistically significant results are shown in *bold*. ns, Nonsignificant ( $P > 0.05$ ).

<sup>a</sup> SNPs in 5'-upstream and genic regions.

<sup>b</sup> SNPs located in the region of −435 up to −1 bp from the start site of mRNA sequence.

<sup>c</sup> SNPs located in mRNA sequence +1 up to +1082 bp from the start site of mRNA sequence.

<sup>d</sup> Estimate of nucleotide diversity ( $\pi$ ) per base pair from average pairwise differences among individuals.

<sup>e</sup> The basis of the Tajima's D statistics ( $D^T$ ) is the difference between observed ( $\pi$ ) and expected ( $\theta$ ) diversity estimates: under neutral conditions,  $\pi = \theta$  and  $D^T = 0$ .

<sup>f</sup>  $P = 0.0169$ .

<sup>g</sup> This statistic tests the observed allele frequency spectrum with the expected allele frequency spectrum under the neutral model (HWE).



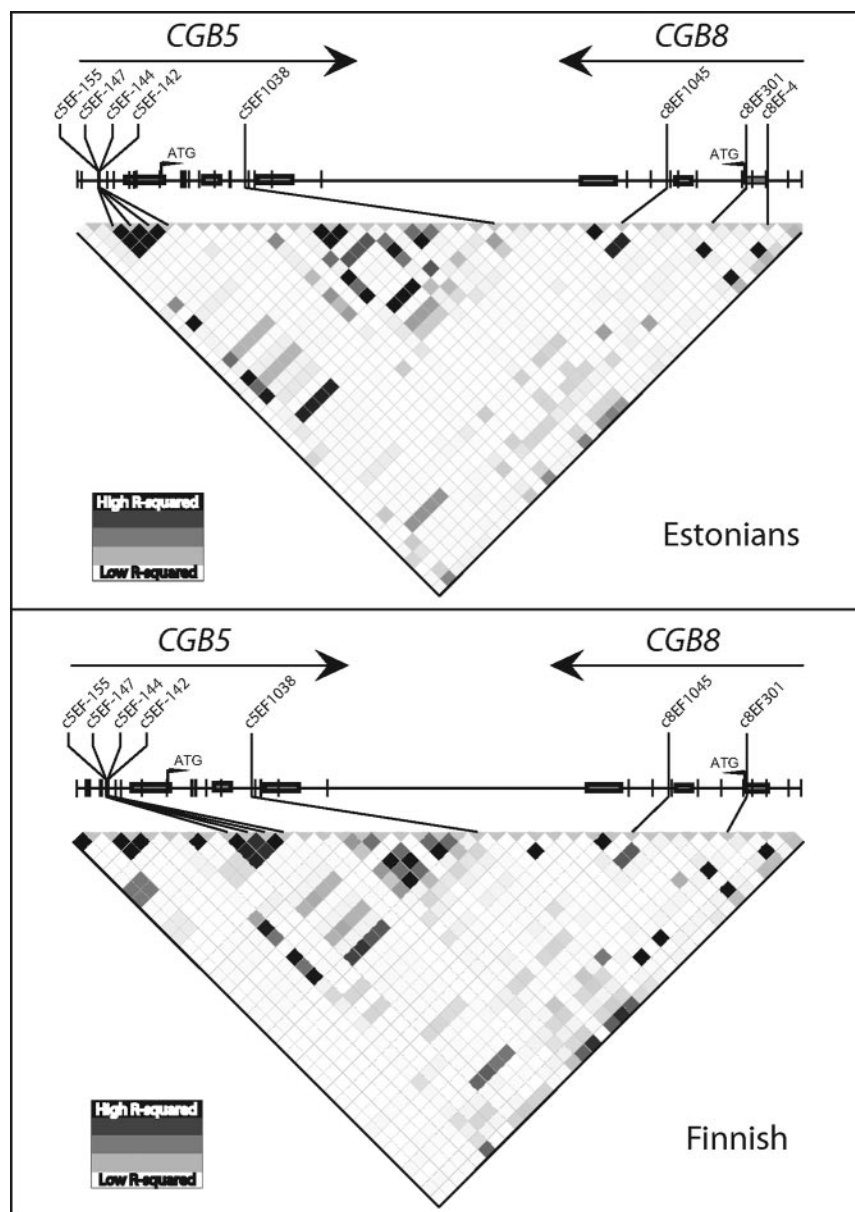

**FIG. 2.** LD structure of the resequenced *CGB5*–*CGB8* genomic region in Estonian and Finnish sample sets. The plot has been drawn based on the  $r^2$  statistic, and polymorphisms are ordered as located on the sense strand of genomic DNA sequence. Singleton variants have been excluded for reliable estimation of LD pattern. The direction of transcription of *CGB5* and *CGB8* genes is depicted with arrows. Polymorphisms with a significant association to RMs (Table 3) are given above the LD plot.

of single marker and haplotype distribution in the two sample sets revealed low population stratification (Table 1 and supplemental Fig. S2) facilitating the joint analysis to increase the statistical power of the study.

In the full case-control sample set, a significant association with RM was detected for the *CGB5* 5'-upstream polymorphisms (c5EF-155, c5EF-147, c5EF-144, and c5EF-142) [ $P < 0.03$ ; OR = 0.58 (95% CI 0.35–0.93); Cochran-Armitage trend test] (Table 3). Analysis of the Estonian [ $P = 0.083$ ; OR = 0.54 (95% CI 0.27–1.1)] and Finnish [ $P \leq 0.131$ ; OR = 0.58 (95% CI 0.29–1.19)] subsamples supported trend for association in both study populations independently, but the  $P$  values did not reach statistical significance ( $P > 0.05$ ) due to reduced samples sizes. The significant association with all four *CGB5* promoter

polymorphisms results from higher minor allele frequency (MAF) in fertile women (12.05–13.08%) compared with the RM group (7.10–7.92%). This difference between the control group and RM cases was consistent in both study populations: 13.16% compared with 8.08% and 11–13% compared with 5.95–7.74%, in Estonians and Finns, respectively (Table 3). On the haplotype network of the *CGB5* upstream region, the promoter variants carrying the minor alleles of the four polymorphisms form a remote clade (H1–H2, H10–H11; Fig. 3A).

Among the *CGB5* genic SNPs, a strong protective effect was detected for the minor allele of intron 2 c5EF1038 [ $P < 0.007$ ; OR = 0.53 (95% CI 0.32–0.85)], represented with the frequency 14.36% in fertile women compared with 8.15% in the RM group (Table 3). This effect reached statistical significance in the separate analysis of the Finnish subjects [ $P = 0.036$ ; OR = 0.48 (95% CI 0.24–0.97)] and showed a trend for association in the Estonian [ $P = 0.079$ ; OR = 0.57 (95% CI 0.30–1.08)] subsample. No increase in protection toward RM was detected for the combination of the minor alleles of the *CGB5* 5'-upstream and the intronic SNP (data not shown).

Notably, the association of four *CGB5* SNPs with the protective effect toward pregnancy loss was sufficiently robust to remain significant even when only the female RM patients ( $n = 109$ ) were considered as cases (Table 4). A separate analysis of male RM patients revealed similar trends for association and protective effect sizes compared with female RM cases, although the  $P$  values were nonsignificant, possibly due to a smaller sample size ( $n = 75$ ) that reduced the statistical power. However, the inclusion of both sexes gave a stronger effect than gender-specific analysis in all but one SNP (c5EF1038; Tables 3 and 4), further supporting the contribution of both maternal and paternal genes in the reproductive success.

Population-specific associations were detected in the Finnish sample collection with two rare SNPs (MAF <10%) in *CGB8*: c8EF301 ( $P = 0.034$ ) and c8EF1045 ( $P = 0.025$ ) (Table 3). Interestingly, the protective variant in the intron 2 of *CGB8* (c8EF1045) is located at the same position within the gene as the *CGB5* intronic variant (c5EF1038).

#### Rare *CGB8* promoter variants increase the susceptibility to RMs

The resequenced *CGB8* 5'-upstream region stands out with only three SNPs (two common and one rare) compared with the

**TABLE 3.** Variants in *CGB5* and *CGB8* genes significantly associated with RM

| SNP                   | Estonians (n = 194)    |                      |       | Finns (n = 185)         |                      |       | All individuals (n = 379) |                       |       |
|-----------------------|------------------------|----------------------|-------|-------------------------|----------------------|-------|---------------------------|-----------------------|-------|
|                       | MAF (%)                |                      |       | MAF (%)                 |                      |       | MAF (%)                   |                       |       |
|                       | Fertile women (n = 95) | RM patients (n = 99) |       | Fertile women (n = 100) | RM patients (n = 85) |       | Fertile women (n = 195)   | RM patients (n = 184) |       |
| c5EF-155              | 13.16                  | 8.08                 | 0.083 | 0.54 (0.27–1.1)         | 0.58 (0.29–1.19)     | 0.129 | 12.31                     | 7.38                  | 0.024 |
| c5EF-147              | 13.16                  | 8.08                 | 0.083 | 0.54 (0.27–1.1)         | 0.52 (0.24–1.13)     | 0.094 | 12.05                     | 7.10                  | 0.018 |
| c5EF-144              | 13.16                  | 8.08                 | 0.083 | 0.54 (0.27–1.1)         | 0.61 (0.31–1.17)     | 0.131 | 13.08                     | 7.92                  | 0.023 |
| c5EF-142              | 13.16                  | 8.08                 | 0.083 | 0.54 (0.27–1.1)         | 0.61 (0.31–1.17)     | 0.131 | 13.08                     | 7.92                  | 0.023 |
| c5EF1038              | 14.47                  | 9.09                 | 0.079 | 0.57 (0.30–1.08)        | 0.48 (0.24–0.97)     | 0.036 | 14.36                     | 8.15                  | 0.007 |
| c8EF301 <sup>a</sup>  | 5.79                   | 5.05                 | 0.740 | 0.86 (0.35–2.12)        | 0.35 (0.12–0.96)     | 0.034 | 7.33                      | 4.24                  | 0.072 |
| c8EF1045 <sup>a</sup> | 0.53                   | 0.51                 | 0.977 | 0.97 (0.06–15.6)        | na                   | 0.025 | 1.83                      | 0.28                  | 0.042 |

Association *P* values and OR with 95% CI was calculated by the Cochran-Armitage test for trend. na, Not applicable as monomorphic among fertile women.

<sup>a</sup> Significant association (*P* > 0.05) only in one population.

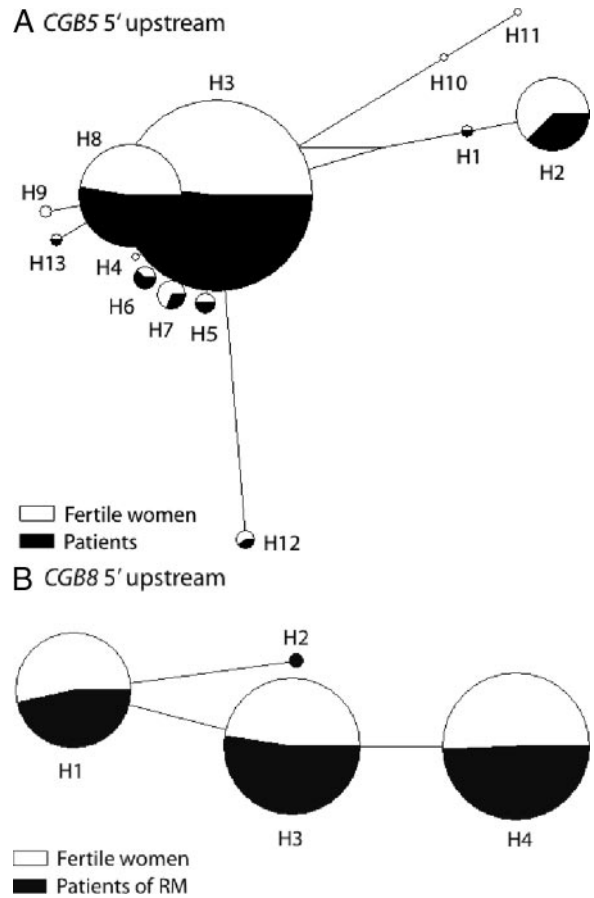

**FIG. 3.** Median-Joining networks of predicted haplotypes in the 5'-upstream region of *CGB5* (A) and *CGB8* (B). Singleton polymorphisms were excluded from the analysis because of unreliable phasing. The size of each node is proportional to the haplotype frequency in the total data set. The relative distribution of each haplotype among the RM cases (black) and fertile controls (white) is indicated. Haplotype nomenclature is shown in supplemental Table S2. A, The carrier status of haplotypes H1–H2 and H10–H11 lowered 1.7-fold the risk of RM. B, Haplotype H2 defined by the minor allele of a proximal promoter mutation c8EF-4 was exclusively identified in RM patients in both study populations, Estonians and Finns. Median-Joining networks of predicted haplotypes in the genic regions of *CGB5* and *CGB8* are shown in supplemental Fig. S3.

respective region for *CGB5* with 18 SNPs (Table 1). The rare allele A of SNP c8EF-4 was solely represented in patients, one from Finland and two from Estonia (Cochran-Armitage trend test, *P* = 0.071). This polymorphism is located within the activating protein (AP)-1-like sequence overlapping the *HCG*  $\beta$ -initiator element critical for basal transcription and downstream of the Ets-2 binding site, acting as a major enhancer of *HCG*  $\beta$ -gene expression (30).

We applied two neutrality tests to explore observed *vs.* expected distribution of SNPs and haplotypes in the 5'-upstream region of *CGB8*. Both the Tajima's D statistic ( $D^T = 2.29$ ; *P* < 0.05; Table 2) as well as Ewens-Watterson homozygosity test (*P* = 0.007) indicated a possible scenario of balancing selection, driving the three apparently most efficient *CGB8* promoter variants (H1, H3, and H4) to high frequency in both populations (Fig. 3B, supplemental Table S2, and supplemental Fig. S2). The rare variant H2 carried the minor allele of c8EF-4, identified solely in patients. Notably, the haplotype combining the minor alleles of c8EF-287 (C; MAF = 25.2%) and c8EF-186 (T;

**TABLE 4.** Case-control analysis after subdividing RM patients by gender

| SNP      | Fertile women<br>(n = 195) | Female RM patients (n = 109) |         |                  | Male RM patients (n = 75) |         |                  |
|----------|----------------------------|------------------------------|---------|------------------|---------------------------|---------|------------------|
|          | MAF (%)                    | MAF (%)                      | P value | OR (95% CI)      | MAF (%)                   | P value | OR (95% CI)      |
| c5EF-155 | 12.31                      | 7.34                         | 0.058   | 0.59 (0.32–1.03) | 7.43                      | 0.105   | 0.57 (0.26–1.13) |
| c5EF-147 | 12.05                      | 6.88                         | 0.039   | 0.53 (0.28–0.98) | 7.43                      | 0.115   | 0.57 (0.28–1.15) |
| c5EF-144 | 13.08                      | 7.34                         | 0.031   | 0.53 (0.29–0.95) | 8.78                      | 0.171   | 0.64 (0.34–1.22) |
| c5EF-142 | 13.08                      | 7.34                         | 0.031   | 0.53 (0.29–0.95) | 8.78                      | 0.171   | 0.64 (0.34–1.22) |
| c5EF1038 | 14.36                      | 6.88                         | 0.006   | 0.45 (0.25–0.81) | 10                        | 0.182   | 0.66 (0.36–1.22) |

The Cochran-Armitage test for trend was performed for the variants in *CGB5* and *CGB8* genes showing significant association with RM in the full sample set (Table 3).

MAF = 39.7%) is expected to be present with the frequency of 10% but was not observed in the current study (Fig. 3B and supplemental Table S2).

## Discussion

Here, we report the first case-control study targeting the variation in *HCG  $\beta$ -genes* in association with RMs. Most association studies on RM have so far focused on susceptibility variants of maternal genes involved in physiological adaptation to pregnancy, such as the development of immunotolerance at fetomaternal interface or alterations in fibrinolytic and coagulation pathways. Because these genes also contribute to complex diseases, the role of their variants in susceptibility to RM may not be specific (5, 8, 22, 31). *HCG  $\beta$ -genes* are expressed in blastocysts shortly after fertilization (20, 32) and are essential for successful implantation. Thus, a genetic variant of these genes is more likely to have an effect on pregnancy outcome. Our study focused on *CGB8* and *CGB5* that provide the major fraction of *HCG  $\beta$ -mRNA* transcripts, and the resequencing method was chosen instead of genotyping.

The human *CGB8* and *CGB5* genes are located among the seven duplicate genes within the *LHB/CGB* gene cluster. Major complications in targeting duplicated genes in association studies are high-sequence similarity (>92%), high diversity, large number of population-specific variants, and low LD due to high gene conversion activity (19, 33). These characteristics make it technically challenging to select reliable tag-SNPs and establish genotyping methods capable of targeting unique SNPs in duplicated genes. In a public SNP database National Center for Biotechnology Information (NCBI) dbSNP, the region is represented by 30 and the *CGB8* region by 44 SNPs. In the 379 subjects, we identified only 14 (47%) and nine (20%) of these, respectively. Several of the variants not observed in our study have been predicted *in silico* or by using high-throughput methods and may actually be multisite or paralogous gene variants (34). Alternatively, some of these SNPs could indeed represent variants specific to other than Estonian or Finnish populations. For example, an amino acid substitution Val79Met (nomenclature based on mature protein; from ATG p.Val99Met) in *CGB5* exon 3 has been reported at carrier frequency 4.2% in a random population from the Midwest of the United States (35), but it was absent in 580 DNA samples originating from five European populations (36). In the current study, in relatively large samples sets

drawn from two neighboring populations, one third of the identified variants (MAF <2%) were found in only one population, although the sample size was sufficient to identify all common variants (MAF >5%) originally described in a large mutation screening of *LHB/CGB* genes [Table 1 (19)]. Full resequencing data collected in this study enabled to identify several rare non-synonymous and promoter variants, and to conduct haplotype analysis.

Consistent with the hypothesis of the study, we identified genetic variants in *HCG  $\beta$ -genes* significantly increasing or reducing the risk of RM. A protective effect was detected for the minor alleles of two SNPs (c5EF1038 and c8EF1045) located at the identical positions in intron 2 in both *CGB5* and *CGB8*, and for four *CGB5* promoter variants (c5EF-155, c5EF-147, c5EF-144, and c5EF-142). The carrier status of the minor alleles of these six SNPs reduced the risk of RM 1.7-fold in comparison to the wild-type carriers. Interestingly, the “protective” alleles of the *CGB5* promoter SNPs form a motif (C-del-C-A; H2 on Fig. 3A) identical to the promoter sequence of *CGB8* (Fig. 1D), which has been shown to be most actively transcribed *HCG  $\beta$ -gene* (18). The actual contribution of these sequence variants to mRNA transcription and splicing efficiency is still to be explored.

The current data suggest the *CGB8* and especially its promoter region to be under stronger functional constraint compared with *CGB5*, despite high DNA sequence similarity (98–99%) between the two genes (supplemental Fig. S1). First, we detected more than two times less polymorphisms in *CGB8* genomic region (n = 22) compared with *CGB5* (n = 49). Second, three rare *CGB8* variants that may exhibit an effect on hormone action were present exclusively in RM patients (p.Arg28Trp, p.Pro93Arg, and a c8EF-4 within proximal promoter) compared with only one such SNP in *CGB5* (p.Val76Leu). Third, the applied neutrality tests indicated a balancing selection in the promoter region of *CGB8*, but not of *CGB5*. In addition, we identified only three of the four predicted major *CGB8* promoter haplotypes (Fig. 3B). The haplotype combining the minor alleles of c8EF-287 (MAF 25.2%) and c8EF-186 (MAF 39.7%) was absent in the current data set despite the relatively high MAF. The discrepancy between observed (0%) and expected (10%) frequency may be explained by the localization of these SNPs within selective promoter factor 1/AP-2 binding sites (37) residing in the critical region for the trophoblast-specific expression as well as cAMP-responsiveness of the *HCG  $\beta$ -gene* transcription (38, 39). Functional studies should reveal whether these



sequence variants indeed possess a combinatory effect influencing the binding of the AP-2 and selective promoter factor 1 transcription factors to the promoter of *HCG*  $\beta$ , and alter the transcription of genes.

One of the key factors in obtaining reliable results in a case-control study is a clearly defined study group and replication of the results in an independent data set. We applied parallel analysis of case-control sample sets collected from two neighboring countries to confirm the robustness of the association across populations. Because the stratification was low between these populations, we also conducted a joint analysis of the two sample sets to increase the statistical power. Although there were minor differences in subject recruitment, the obtained results were concordant in two populations, and the strength of detected associations increased in the analysis of the pooled data set. In addition, we identified two gene variants lowering the risk of RM in the Finnish data set only possibly owing to the specific demographical history of the Finnish population (40).

In conclusion, these data from two populations provide the first evidence for the role of the variation in *HCG*  $\beta$ -genes in contributing to the susceptibility of RM. The findings encourage further studies addressing the functional effect of the identified promoter, intronic, and rare protein-altering variants on *HCG*  $\beta$ -gene expression and HCG hormone activity. The diagnostic application of our findings may facilitate the improvement of early and preventive treatment of RM.

## Acknowledgments

We thank the participating patients, Professor Helle Karro and Dr. Andres Salumets for providing facilities for patient material collection, and Dr. Pille Hallast for advice in resequencing of the *LHB/CGB* genes.

Address all correspondence and requests for reprints to: Maris Laan, Department of Biotechnology, Institute of Molecular and Cell Biology, University of Tartu; Riia Street 23, 51010 Tartu, Estonia. E-mail: maris.laan@ut.ee.

M.L. is the Howard Hughes Medical Institute International Scholar (Grant 55005617) and Wellcome Trust International Senior Research Fellow in Biomedical Science in Central Europe (Grant 070191/Z/03/Z). In addition, funding for the work was partially provided by Estonian Science Foundation Grants 5796 and 7471 (to K.R., L.N., P.K., and M.L.), and Estonian Ministry of Education and Science Core Grants 0182721s06 (to M.L., K.R., L.N., T.M., and P.K.) and 0182641s04 (to K.R.), as well as by Sigrid Juselius Foundation & Finnish State Fund (to V.-M.U., M.K., K.A.) and Sanofi-Aventis (to V.-M.U.). K.R. and L.N. have been awarded by fellowships from Graduate School in Biomedicine and Biotechnology (1.0101-0167).

Disclosure Statement: The authors have nothing to disclose.

## References

- Berry CW, Brambati B, Eskes TK, Exalto N, Fox H, Geraedts JP, Gerhard I, Gonzales Gomes F, Grudzinskas JG, Hustin J 1995 The Euro-Team Early Pregnancy (ETEP) protocol for recurrent miscarriage. *Hum Reprod* 10: 1516–1520
- Jauniaux E, Farquharson RG, Christiansen OB, Exalto N 2006 Evidence-based guidelines for the investigation and medical treatment of recurrent miscarriage. *Hum Reprod* 21:2216–2222
- Li TC, Makris M, Tomsu M, Tuckerman E, Laird S 2002 Recurrent miscarriage: aetiology, management and prognosis. *Hum Reprod Update* 8:463–481
- Christiansen OB 1996 A fresh look at the causes and treatments of recurrent miscarriage, especially its immunological aspects. *Hum Reprod Update* 2:271–293
- Goodman CS, Coulam CB, Jeyendran RS, Acosta VA, Roussev R 2006 Which thrombophilic gene mutations are risk factors for recurrent pregnancy loss? *Am J Reprod Immunol* 56:230–236
- Rey E, Kahn SR, David M, Shrier I 2003 Thrombophilic disorders and fetal loss: a meta-analysis. *Lancet* 361:901–908
- Robertson L, Wu O, Langhorne P, Twaddle S, Clark P, Lowe GDO, Walker ID, Greaves M, Brenkel I, Regan L, Greer IA 2006 Thrombophilia in pregnancy: a systematic review. *Br J Haematol* 132:171–196
- Hviid TV 2006 HLA-G in human reproduction: aspects of genetics, function and pregnancy complications. *Hum Reprod Update* 12:209–232
- Licht P, Fluhr H, Neuwinger J, Wallwiener D, Wildt L 2007 Is human chorionic gonadotropin directly involved in the regulation of human implantation? *Mol Cell Endocrinol* 269:85–92
- Toth P, Lukacs H, Gimes G, Sebestyen A, Pasztor N, Paulin F, Rao CV 2001 Clinical importance of vascular LH/hCG receptors—a review. *Reprod Biol* 1:5–11
- Herr F, Baal N, Reisinger K, Lorenz A, McKinnon T, Preissner KT, Zygmunt M 2007 HCG in the regulation of placental angiogenesis. Results of an in vitro study. *Placenta* 28(Suppl A):S85–S93
- Kayisli UA, Selam B, Guzeloglu-Kayisli O, Demir R, Arici A 2003 Human chorionic gonadotropin contributes to maternal immunotolerance and endometrial apoptosis by regulating Fas-Fas ligand system. *J Immunol* 171: 2305–2313
- Buyalos RP, Glassman LM, Rifka SM, Falk RJ, Macarthy PO, Tyson VJ, DiMattina M 1992 Serum  $\beta$ -human chorionic gonadotropin, estradiol and progesterone as early predictors of pathologic pregnancy. *J Reprod Med* 37: 261–266
- Dumps P, Meisser A, Pons D, Morales MA, Anguenot JL, Campana A, Bischof P 2002 Accuracy of single measurements of pregnancy-associated plasma protein-A, human chorionic gonadotropin and progesterone in the diagnosis of early pregnancy failure. *Eur J Obstet Gynecol Reprod Biol* 100:174–180
- Tong S, Wallace EM, Rombauts L 2006 Association between low day 16 hCG and miscarriage after proven cardiac activity. *Obstet Gynecol* 107(2 Pt 1): 300–304
- Bo M, Boime I 1992 Identification of the transcriptionally active genes of the chorionic gonadotropin  $\beta$  gene cluster in vivo. *J Biol Chem* 267:3179–3184
- Miller-Lindholm AK, LaBenz CJ, Ramey J, Bedows E, Ruddon RW 1997 Human chorionic gonadotropin- $\beta$  gene expression in first trimester placenta. *Endocrinology* 138:5459–5465
- Rull K, Laan M 2005 Expression of  $\beta$ -subunit of human chorionic gonadotropin genes during the normal and failed pregnancy. *Hum Reprod* 20: 3360–3368
- Hallast P, Nagiraja L, Margus T, Laan M 2005 Segmental duplications and gene conversion: human luteinizing hormone/chorionic gonadotropin  $\beta$  gene cluster. *Genome Res* 15:1535–1546
- Rull K, Hallast P, Uusküla L, Jackson J, Punab M, Salumets A, Campbell RK, Laan M 2008 Fine-scale quantification of HCG  $\beta$  gene transcription in human trophoblastic and non-malignant non-trophoblastic tissues. *Mol Hum Reprod* 14:23–31
- Ulander VM 2007 Venous thromboembolism during pregnancy and the impact of thrombophilia in pregnancy complications, PhD thesis, University of Helsinki, Faculty of Medicine, Institute of Clinical Medicine (<http://urn.fi/URN:ISBN:978-952-10-3671-2>)
- Kaare M, Ulander VM, Painter JN, Ahvenainen T, Kaaja R, Aittomäki K 2007 Variations in the thrombomodulin and endothelial protein C receptor genes in couples with recurrent miscarriage. *Hum Reprod* 22:864–868
- Bhangale TR, Stephens M, Nickerson DA 2006 Automating resequencing-based detection of insertion-deletion polymorphisms. *Nat Genet* 38:1457–1462
- Stephens M, Smith N, Donnelly P 2001 A new statistical method for haplotype reconstruction from population data. *Am J Hum Genet* 68:978–989
- Rozas J, Rozas R 1999 DnaSP version 3: an integrated program for molecular population and molecular evolution analysis. *Bioinformatics* 15:174–175
- Tajima F 1989 Statistical method for testing the neutral mutation hypothesis by DNA polymorphism. *Genetics* 123:585–595
- Schneider S, Roessli D, Excoffier L 2000 Arlequin version 2.000: a software for population genetic data analysis. Geneva: Genetics and Biometry Laboratory, University of Geneva, Switzerland
- Bandelt HJ, Forster P, Röhl A 1999 Median-joining networks for inferring intraspecific phylogenies. *Mol Biol Evol* 16:37–48

29. Barrett JC, Fry B, Maller J, Daly MJ 2005 Haploview: analysis and visualization of LD and haplotype maps. *Bioinformatics* 21:263–265
30. Ghosh D, Ezashi T, Ostrowski MC, Roberts RM 2003 A central role for Ets-2 in the transcriptional regulation and cyclic adenosine 5'-monophosphate responsiveness of the human chorionic gonadotropin- $\beta$  subunit gene. *Mol Endocrinol* 17:11–26
31. Dosiou C, Giudice LC 2005 Natural killer cells in pregnancy and recurrent pregnancy loss: endocrine and immunologic perspectives. *Endocr Rev* 26:44–62
32. Jurisicova A, Antenos M, Kapasi K, Meriano J, Casper RF 1999 Variability in the expression of trophectodermal markers  $\beta$ -human chorionic gonadotropin, human leukocyte antigen-G and pregnancy specific  $\beta$ -1 glycoprotein by the human blastocyst. *Hum Reprod* 14:1852–1858
33. Sedman L, Padhukasahasram B, Kelgo P, Laan M 2008 Complex signatures of locus-specific selective pressures and gene conversion on human growth hormone/chorionic somatomammotropin genes. *Hum Mutat* 29:1181–1193
34. Fredman D, White SJ, Potter S, Eichler EE, Den Dunnen JT, Brookes AJ 2004 Complex SNP-related sequence variation in segmental genome duplications. *Nat Genet* 36:861–866
35. Miller-Lindholm AK, Bedows E, Bartels CF, Ramey J, Maclin V, Ruddon RW 1999 A naturally occurring genetic variant in the human chorionic gonadotropin- $\beta$  gene 5 is assembly inefficient. *Endocrinology* 140:3496–3506
36. Jiang M, Savontaus ML, Simonsen H, Williamson C, Müllenbach R, Gromoll J, Terwort N, Alevizaki M, Huhtaniemi I 2004 Absence of the genetic variant Val79Met in human chorionic gonadotropin- $\beta$  gene 5 in five European populations. *Mol Hum Reprod* 10:763–766
37. Johnson W, Jameson JL 1999 AP-2 (activating protein 2) and Sp1 (selective promoter factor 1) regulatory elements play distinct roles in the control of basal activity and cyclic adenosine 3',5'-monophosphate responsiveness of the human chorionic gonadotropin- $\beta$  promoter. *Mol Endocrinol* 13:1963–1975
38. Albanese C, Kay TW, Troccoli NM, Jameson JL 1991 Novel cyclic adenosine 3',5'-monophosphate response element in the human chorionic gonadotropin  $\beta$ -subunit gene. *Mol Endocrinol* 5:693–702
39. Steger DJ, Hecht JH, Mellon PL 1994 GATA-binding proteins regulate the human gonadotropin  $\alpha$ -subunit gene in the placenta and pituitary gland. *Mol Cell Biol* 14:5592–5602
40. Norio R, Nevanlinna HR, Perheentupa J 1973 Hereditary diseases in Finland; rare flora in rare soul. *Ann Clin Res* 5:109–141
